# Supplementary material for: Fungal communities living within leaves of native Hawaiian dicots are structured by landscape-scale variables as well as by host plants
Source: bioRxiv or medRxiv preprint supplement (doi:10.1101/640029), 2020-06-26

Figure 1: Map of sample locations across the Hawaiian Archipelago. Samples were collected from the 5 major islands in the Hawaiian archipelago: Hawai'i, Maui, Moloka'i, O'ahu, and Kaua'i. Sampling was most dense on Hawai'i and on O'ahu islands, where accessibility was easiest. Our sampling strategy was to use elevational transects where possible, in order to capture elevational and climatic variation. Elevations in figure legend are meters above sea level. This is visible in the transects on Hawai'i, Moloka'i, Kaua'i, and O'ahu, which run orthogonally to the topographic lines (white). Transects are less pronounced on Maui because of limited accessibility.

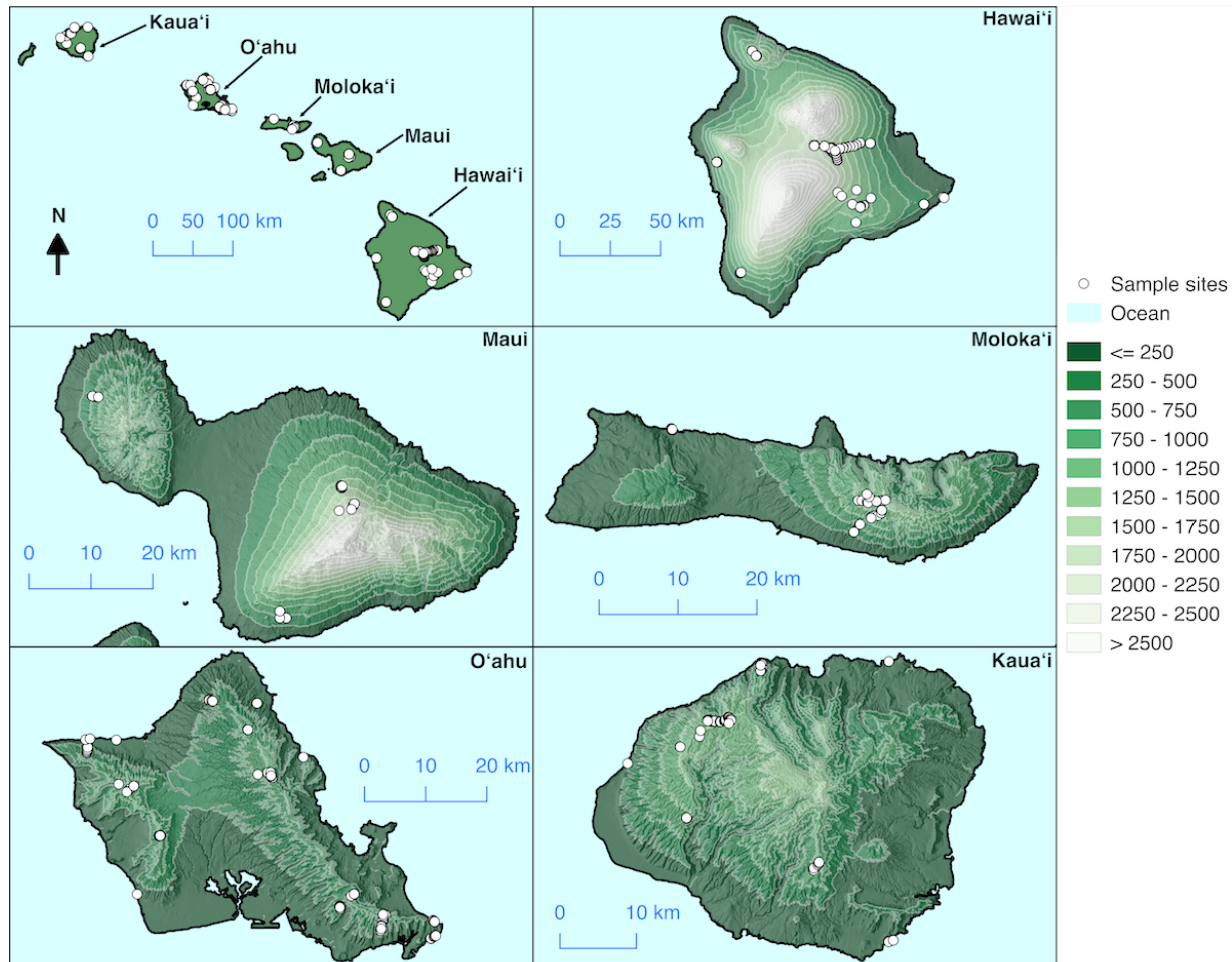

Supplement: Supplementary file [file media-1.pdf]
