# Supplementary material for: Fungal communities living within leaves of native Hawaiian dicots are structured by landscape-scale variables as well as by host plants
Source: bioRxiv or medRxiv preprint supplement (doi:10.1101/640029), 2020-06-26

Figure 2: Ranges and distributions of explanatory variables. In this figure, each variable’s distribution across 722 samples is shown as a smoothed density curve between its range (numbers to left and right of curves, height of curve is relative frequency of observation). Units for range values are shown in Table 1. Each variable included in our analysis covered a wide range of environmental heterogeneity.

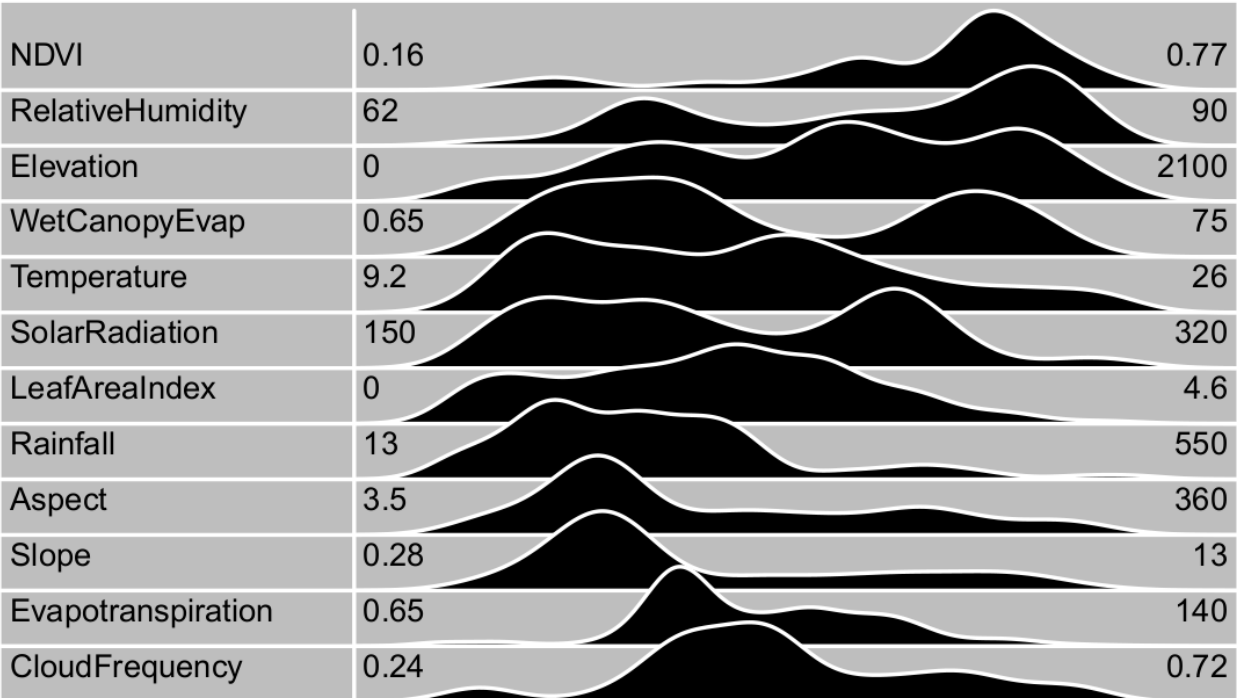

Supplement: Supplementary file [file media-2.pdf]
