# Supplementary material for: Fungal communities living within leaves of native Hawaiian dicots are structured by landscape-scale variables as well as by host plants
Source: bioRxiv or medRxiv preprint supplement (doi:10.1101/640029), 2020-06-26

Figure 4: FEF specialization of each island.  $d'$  is a measure of how unique or cosmopolitan are the zOTUs found on an island. In this violin plot, distributions shown in as filled violins with black borders are bootstrapped empirical  $d'$  values for each island. Unfilled distributions with a solid gray border are from our island null model, where the island datum of each sample was randomly permuted before samples were aggregated and  $d'$  was calculated. Unfilled distributions with black dashed borders are from the Vázquez null model for bipartite networks (Vázquez et al., 2007), which is a fixed-connectance null model. Welch's unequal variance  $t$ -tests show that each island's FEF community is significantly specialized as compared to the island null, meaning that FEF zOTUs are more specific to their island of origin than expected by chance.

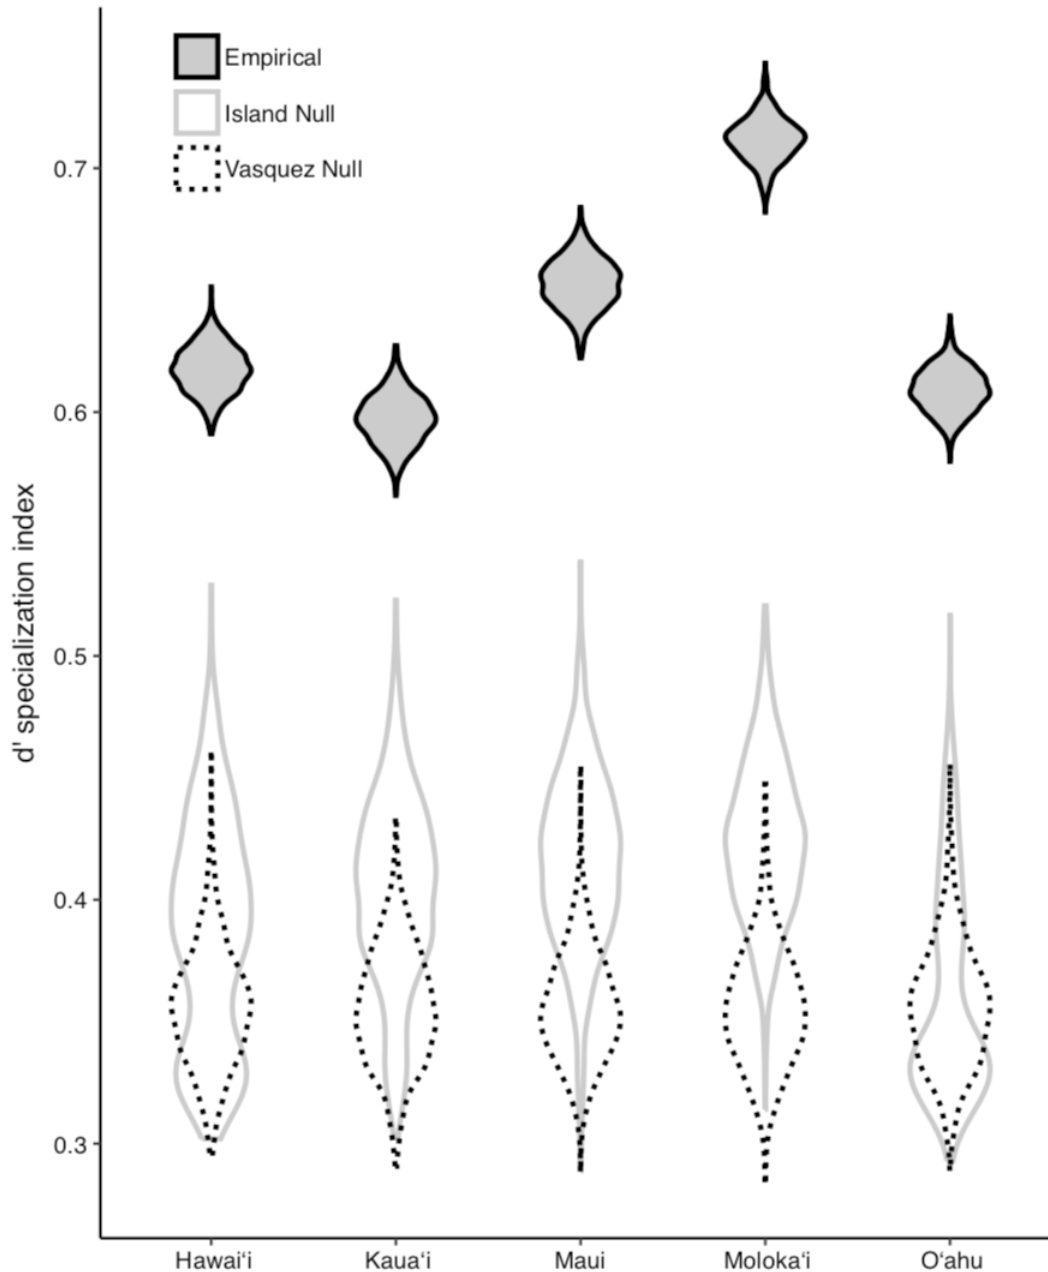

Supplement: Supplementary file [file media-4.pdf]
