# Supplementary material for: Fungal communities living within leaves of native Hawaiian dicots are structured by landscape-scale variables as well as by host plants
Source: bioRxiv or medRxiv preprint supplement (doi:10.1101/640029), 2020-06-26

Figure S2: Relationship between UniFrac and Bray-Curtis dissimilarity matrices. Bray-Curtis dissimilarity (bottom) results in an inflation of 1-distances (max dissimilarity) because of sample pairs that share no zOTUs (dashed lines corresponding to histograms represent the frequency of sample comparisons with a given dissimilarity bin). UniFrac (left) does not have this problem, because phylogenetic differences among zOTUs are used instead of presence-absence differences (although both metrics are weighted by relative abundance).

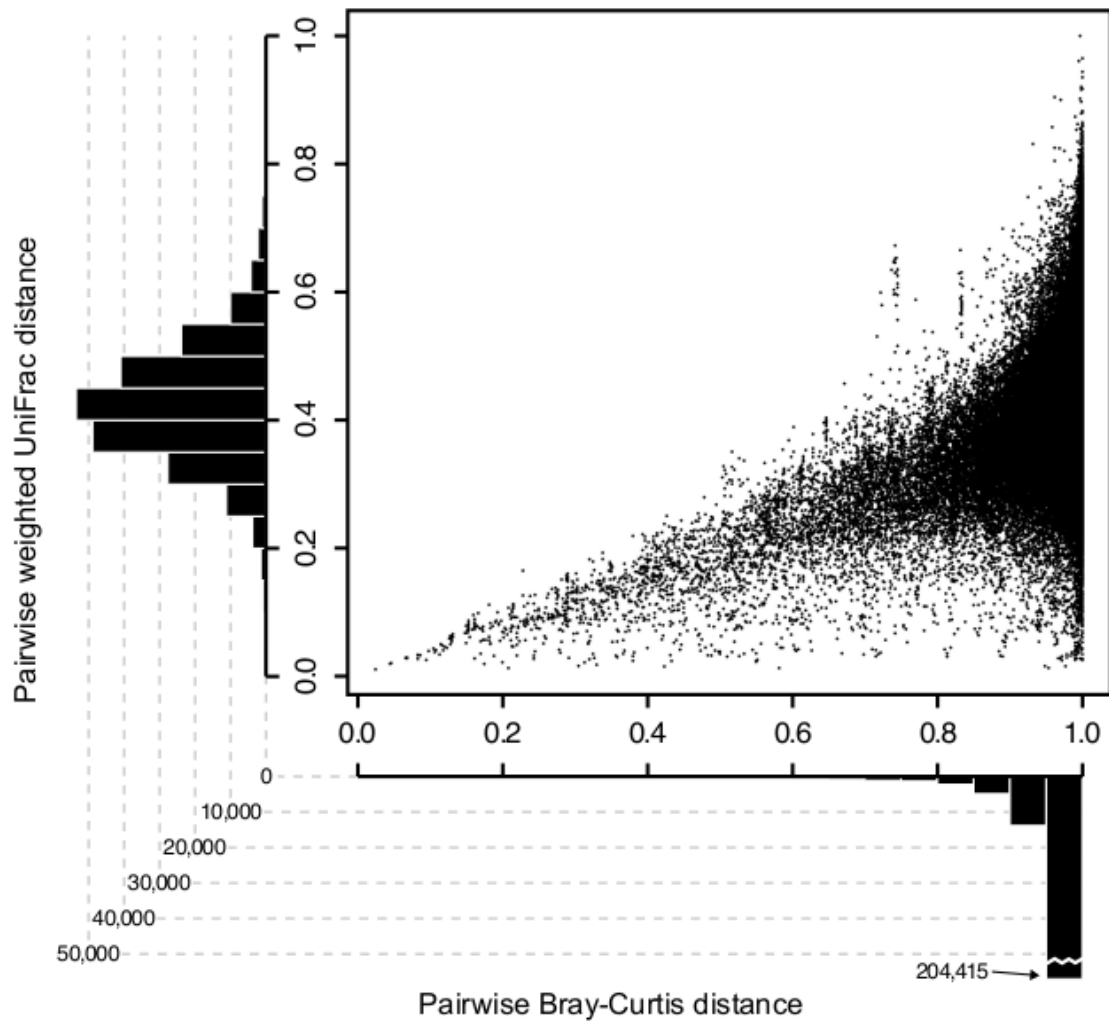

Supplement: Supplementary file [file media-6.pdf]
