# Supplementary material for: Fungal communities living within leaves of native Hawaiian dicots are structured by landscape-scale variables as well as by host plants
Source: bioRxiv or medRxiv preprint supplement (doi:10.1101/640029), 2020-06-26
Supplement: Supplementary file [file media-11.pdf]

Table S1: Most common plant genera observed on each island. The four most common genera are shown, as well as their counts per island (in parenthesis).

| Island  | n Samp | Genus 1                 | Genus 2                  | Genus 3                   | Genus 4                  |
|---------|--------|-------------------------|--------------------------|---------------------------|--------------------------|
| Oahu    | 123    | <i>Metrosideros</i> (9) | <i>Coprosma</i> (7)      | <i>Pittosporum</i> (7)    | <i>Scaevola</i> (6)      |
| Hawaii  | 399    | <i>Vaccinium</i> (127)  | <i>Metrosideros</i> (77) | <i>Leptecophylla</i> (73) | <i>Coprosma</i> (16)     |
| Kauai   | 80     | <i>Scaevola</i> (8)     | <i>Cyrtandra</i> (5)     | <i>Metrosideros</i> (4)   | <i>Vaccinium</i> (4)     |
| Maui    | 51     | <i>Acacia</i> (3)       | <i>Coprosma</i> (3)      | <i>Diospyros</i> (3)      | <i>Dodonaea</i> (3)      |
| Molokai | 67     | <i>Scaevola</i> (9)     | <i>Vaccinium</i> (4)     | <i>Dubautia</i> (3)       | <i>Leptecophylla</i> (3) |
